# Supplementary material
Source: PubMed Central journal article supplement (PMC3001598)

# Supplemental Figure 1

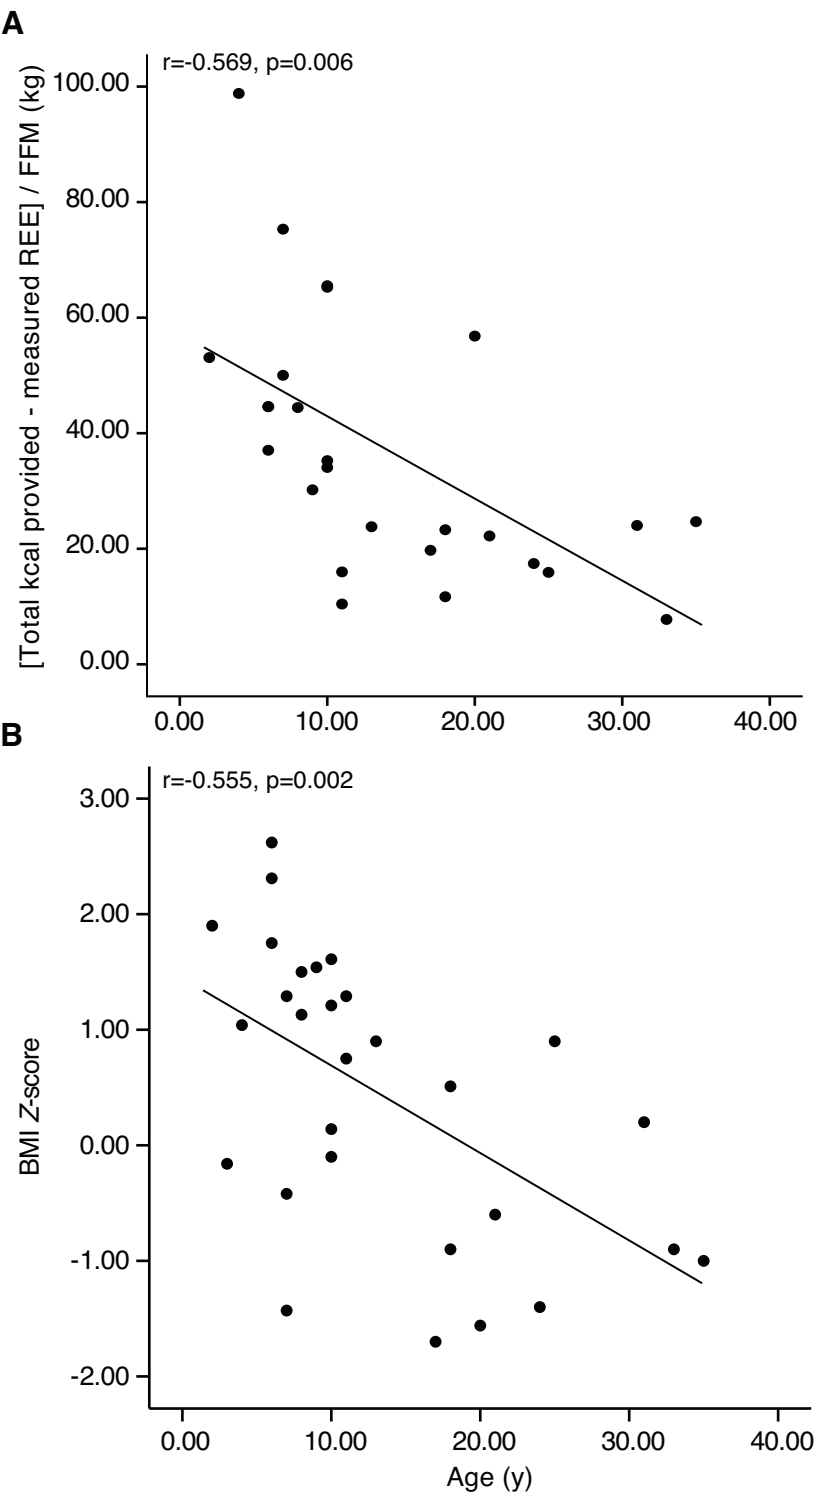

**Supplemental Figure 1:** Bivariate correlations are displayed for the excess calories provided, expressed as [total calories provided - measured REE] per kg FFM, over age (panel A,  $n=26$ ), as well as for BMI-for-age Z-score over age (Panel B,  $n=29$ ). Pearson correlation coefficient and respective p-values are depicted. The box-plot (Panel C) presents means  $\pm$  SD for BMI-for-age Z-score in three different age subgroups: 2-9y ( $1.089 \pm 1.18, n=12$ ), 10-18y ( $0.37 \pm 1.03, n=10$ ) and >18y ( $-0.62 \pm 0.88, n=7$ ). The difference between the age subgroups was statistically significant (one-way-ANOVA,  $p=0.009$ ).

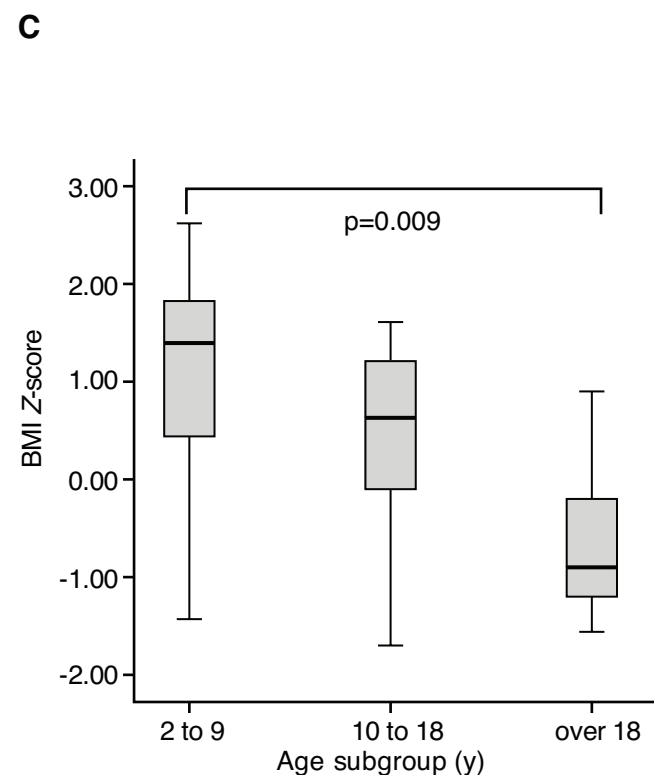

Supplement: supp_110.004341_ajcn004341_SF1.pdf [file supp_110.004341_ajcn004341_SF1.pdf]
